# Supplementary material
Source: PubMed Central journal article supplement (PMC4820637)

Corresponding Author: Liset Menéndez de la Prida

Manuscript Number: NN-A51927A

Manuscript Type: Article

# Main Figures: 7

# Supplementary Figures: 7

# Supplementary Tables: 2

# Supplementary Videos:                     

## Reporting Checklist for Nature Neuroscience

This checklist is used to ensure good reporting standards and to improve the reproducibility of published results. For more information, please read [Reporting Life Sciences Research](#).

Please note that in the event of publication, it is mandatory that authors include all relevant methodological and statistical information in the manuscript.

### ► Statistics reporting, by figure

- Please specify the following information for each panel reporting quantitative data, and where each item is reported (section, e.g. Results, & paragraph number).
- Each figure legend should ideally contain an exact sample size (n) for each experimental group/condition, where n is an exact number and not a range, a clear definition of how n is defined (for example x cells from x slices from x animals from x litters, collected over x days), a description of the statistical test used, the results of the tests, any descriptive statistics and clearly defined error bars if applicable.
- For any experiments using custom statistics, please indicate the test used and stats obtained for each experiment.
- Each figure legend should include a statement of how many times the experiment shown was replicated in the lab; the details of sample collection should be sufficiently clear so that the replicability of the experiment is obvious to the reader.
- For experiments reported in the text but not in the figures, please use the paragraph number instead of the figure number.

**Note:** Mean and standard deviation are not appropriate on small samples, and plotting independent data points is usually more informative. When technical replicates are reported, error and significance measures reflect the experimental variability and not the variability of the biological process; it is misleading not to state this clearly.

|                            |                 | TEST USED             |              | n                                  |                       |                             | DESCRIPTIVE STATS (AVERAGE, VARIANCE) |             | P VALUE               |                 | DEGREES OF FREEDOM & F/t/z/R/ETC VALUE |  |
|----------------------------|-----------------|-----------------------|--------------|------------------------------------|-----------------------|-----------------------------|---------------------------------------|-------------|-----------------------|-----------------|----------------------------------------|--|
| FIGURE NUMBER              | WHICH TEST?     | SECTION & PARAGRAPH # | EXACT VALUE  | DEFINED?                           | SECTION & PARAGRAPH # | REPORTED?                   | SECTION & PARAGRAPH #                 | EXACT VALUE | SECTION & PARAGRAPH # | VALUE           | SECTION & PARAGRAPH #                  |  |
| example<br>1a              | one-way ANOVA   | Fig. legend           | 9, 9, 10, 15 | mice from at least 3 litters/group | Methods para 8        | error bars are mean +/- SEM | Fig. legend                           | p = 0.044   | Fig. legend           | F(3, 36) = 2.97 | Fig. legend                            |  |
| example<br>results, para 6 | unpaired t-test | Results para 6        | 15           | slices from 10 mice                | Results para 6        | error bars are mean +/- SEM | Results para 6                        | p = 0.0006  | Results para 6        | t(28) = 2.808   | Results para 6                         |  |

| FIGURE NUMBER                                 | TEST USED               |                        | n                         |                                               |                        | DESCRIPTIVE STATS (AVERAGE, VARIANCE)                       |                       | P VALUE                                |                        | DEGREES OF FREEDOM & F/t/z/R/ETC VALUE                         |                        |
|-----------------------------------------------|-------------------------|------------------------|---------------------------|-----------------------------------------------|------------------------|-------------------------------------------------------------|-----------------------|----------------------------------------|------------------------|----------------------------------------------------------------|------------------------|
|                                               | WHICH TEST?             | SECTION & PARAGRAPH #  | EXACT VALUE               | DEFINED?                                      | SECTION & PARAGRAPH #  | REPORTED?                                                   | SECTION & PARAGRAPH # | EXACT VALUE                            | SECTION & PARAGRAPH #  | VALUE                                                          | SECTION & PARAGRAPH #  |
| +<br>-<br>results para 1 (MP)<br>supp table 1 | unpaired t-test         | Results para 1 table 1 | 12,10                     | cells from 21 rats                            | Results para 1 table 1 | mean +/- SD                                                 | Meth ods para 38      | p = 0.1126                             | Results para 1 table 1 | t(20)=-1.6796                                                  | Results para 1 table 1 |
| +<br>-<br>fig1e                               | Measured repeated anova | Results para 1         | Contra: 7,11<br>Ipsi: 4,4 | cells from 18 rats (contra) and 8 rats (Ipsi) | Results para 1         | Lines/Shading are mean+/-SD                                 | Meth ods para 38      | p = 0,019 (Contra)<br>p = 0,060 (Ipsi) | Results para 1         | F(1.22, 3.69) = 15,245 (Contra)<br>F(1.07, 4.27) = 6.33 (Ipsi) | Results para 1         |
| +<br>-<br>supp fig1b                          | Measured repeated anova | Supp. Fig. legend      | Contra: 7,11<br>Ipsi: 4,4 | cells from 18 rats (contra) and 8 rats (Ipsi) | Supp. Fig. legend      | Lines/Shading are mean+/-SD                                 | Meth ods para 38      | p = 0.839 (Contra)<br>p = 0.471 (Ipsi) | Supp. Fig. legend      | F(2.12, 14.85)=0.192 (Contra)<br>F(1.10, 4.37)=0.729           | Supp. Fig. legend      |
| +<br>-<br>1f corr                             | Pearson correlation     | Results para 1         | 7,11                      | cells from 17 rats                            | Results para 1         | Regression line                                             | Meth ods para 38      | p = 6.3551e-7                          | Results para 1         | r(16)=89.25                                                    | Results para 1         |
| +<br>-<br>1f x axis                           | unpaired t-test         | Results para 1         | 11,10                     | cells from 20 rats                            | Results para 1         | point/error bars are mean+/-SD                              | Meth ods para 38      | p = 0.0041                             | Results para 1         | t(19) = 3.2662                                                 | Results para 1         |
| +<br>-<br>1f y axis                           | unpaired t-test         | Results para 1         | 7,11                      | cells from 17 rats                            | Results para 1         | point/error bars are mean+/-SD                              | Meth ods para 38      | p = 0.0067                             | Results para 1         | t(16) = 3.1086                                                 | Results para 1         |
| +<br>-<br>1g left                             | unpaired t-test         | Results para 1         | 11,10                     | cells from 20 rats                            | Results para 1         | error bars are mean +/- SD                                  | Meth ods para 38      | p = 2.1995e-7                          | Results para 1         | t(19) = 7.8543                                                 | Results para 1         |
| +<br>-<br>1g right                            | unpaired t-test         | Results para 1         | 7,11                      | cells from 17 rats                            | Results para 1         | error bars are mean +/- SD                                  | Meth ods para 38      | p = 0.0001                             | Results para 1         | t(16) = 5.0947                                                 | Results para 1         |
| +<br>-<br>supp fig2b right                    | chi-2 test              | Results para 2         | 7,7                       | cells from 13 rats                            | Results para 2         | significance of correlation bet cell response to Rad Sink   | Supp. Fig. legend     | p=0.0012                               | Results para 2         | X2(3,14)=10.50                                                 | Results para 2         |
| +<br>-<br>supp fig2c right                    | chi-2 test              | Results para 2         | 7,7                       | cells from 13 rats                            | Results para 2         | Significance of correlation bet cell response to Pyr Source | Supp. Fig. legend     | p=0.5148                               | Results para 2         | X2(3,14)=0.42                                                  | Results para 2         |
| +<br>-<br>supp fig2a right top                | unpaired t-test         | Results para 2         | 7,7                       | cells from 13 rats                            | Results para 2         | error bars are mean +/- SD                                  | Meth ods para 38      | p = 0.9671                             | Results para 2         | t(12)=-0.0421                                                  | Results para 2         |
| +<br>-<br>supp fig2a bott on                  | unpaired t-test         | Results para 2         | 7,7                       | cells from 13 rats                            | Results para 2         | error bars are mean +/- SD                                  | Meth ods para 38      | p = 0.5651                             | Results para 2         | t(12)=-0.5909                                                  | Results para 2         |

|        |                                                                 |                        |                                           |      |                    |                                           |                               |                                                    |             |                                           |                 |                     |
|--------|-----------------------------------------------------------------|------------------------|-------------------------------------------|------|--------------------|-------------------------------------------|-------------------------------|----------------------------------------------------|-------------|-------------------------------------------|-----------------|---------------------|
| +<br>- | 2e<br>left                                                      | unpaired t-<br>test    | Results<br>para 3                         | 9,12 | cells from 20 rats | Results<br>para 3                         | error bars are<br>mean +/- SD | Meth<br>ods<br>para<br>38                          | p = 0.0124  | Results<br>para 3                         | t(19) = -2.7615 | Results<br>para 3   |
| +<br>- | 2e<br>right                                                     | unpaired t-<br>test    | Results<br>para 3                         | 9,12 | cells from 20 rats | Results<br>para 3                         | error bars are<br>mean +/- SD | Meth<br>ods<br>para<br>38                          | p = 0.0147  | Results<br>para 3                         | t(19)=-2.6831   | Results<br>para 3   |
| +<br>- | Resul<br>ts<br>para<br>3                                        | unpaired t-<br>test    | Results<br>para 3                         | 5,9  | cells from 14 rats | Results<br>para 3                         | each case                     | Meth<br>ods<br>para<br>38                          | p=0.5892    | Results<br>para 3                         | t(12)=0.5547    | Results<br>para 3   |
| +<br>- | fig2f                                                           | Pearson<br>correlation | Supp<br>Fig.<br>legend                    | 5,9  | cells from 14 rats | Supp Fig.<br>legend                       | regression line               | Meth<br>ods<br>para<br>38                          | p = 0.0137  | Supp Fig.<br>legend                       | r(12)=-0.6401   | Supp Fig.<br>legend |
| +<br>- | Resul<br>ts<br>Para<br>4<br>(prox<br>imod<br>istal<br>dist)     | unpaired t-<br>test    | Results<br>para 4<br>supp<br>table 1      | 11,7 | cells from 17 rats | Results<br>para 4<br>supp<br>table 1      | mean +/- SD                   | Result<br>s para<br>4<br>Meth<br>ods<br>para<br>38 | p = 0.6713  | Results<br>para 4                         | t(16)=-0.4322   | Results<br>para 4   |
| +<br>- | Resul<br>ts<br>Para<br>4<br>(med<br>iolat<br>eral<br>dist)      | unpaired t-<br>test    | Results<br>para 4<br>supp<br>table 1      | 11,7 | cells from 17 rats | Results<br>para 4<br>supp<br>table 1      | mean +/- SD                   | Result<br>s para<br>4<br>Meth<br>ods<br>para<br>38 | p = 0.7262  | Results<br>para 4<br>supp<br>table 1      | t(16)=0.3564    | Results<br>para 4   |
| +<br>- | Resul<br>ts<br>para<br>4<br>supp<br>table<br>1<br>(CA2<br>dist) | unpaired t-<br>test    | Results<br>para 4<br>supp<br>table 1      | 11,7 | cells from 17 rats | Results<br>para 4<br>supp<br>table 1      | mean +/- SD                   | Result<br>s para<br>4<br>Meth<br>ods<br>para<br>38 | p=0.9159    | Results<br>para 4<br>supp<br>table 1      | t(16)=-0.1073   | Results<br>para 4   |
| +<br>- | fig3b<br>supp<br>table<br>1<br>(rad<br>dist)                    | unpaired t-<br>test    | Results<br>para 4<br>supp<br>table 1      | 11,7 | cells from 17 rats | Results<br>para 4<br>supp<br>table 1      | error bars are<br>mean +/- SD | Meth<br>ods<br>para<br>38<br>supp<br>table<br>1    | p = 0.0152  | supp<br>table 1                           | t(16)=-2.7184   | Results<br>para 4   |
| +<br>- | supp<br>fig4d                                                   | Pearson<br>correlation | Supp.<br>Fig.<br>legend                   | 11,7 | cells from 17 rats | Results<br>para 4                         | regression line               | Supp.<br>Fig.<br>legend                            | p = 0.04835 | Results<br>para 4                         | r(16)= -0.4713  | Results<br>para 4   |
| +<br>- | fig3b<br>supp<br>fig4d<br>supp<br>table<br>1                    | Chi-2 test             | fig3b<br>supp<br>fig4d<br>supp<br>table 1 | 11,7 | cells from 17 rats | fig3b<br>supp<br>fig4d<br>supp<br>table 1 | observed cases                | fig3b<br>supp<br>fig4d<br>supp<br>table<br>1       | p=0.0660    | fig3b<br>supp<br>fig4d<br>supp<br>table 1 | X2(3,18)=3,3779 | Results<br>para 4   |

|        |                                              |                             |                   |      |                                          |                         |                                    |                   |                                      |                                 |                                    |                                  |
|--------|----------------------------------------------|-----------------------------|-------------------|------|------------------------------------------|-------------------------|------------------------------------|-------------------|--------------------------------------|---------------------------------|------------------------------------|----------------------------------|
| +<br>- | supp table 1                                 | Chi-2 test                  | supp table 1      | 11,7 | cells from 17 rats                       | supp table 1            | observed cases                     | supp table 1      | p = 0.0062                           | supp table 1                    | X <sup>2</sup> (3,18)=7.4805       | Results para 4                   |
| +<br>- | fig3f<br>deep / superficial                  | unpaired t-test             | Results para 4    | 11,7 | cells from 17 rats                       | Results para 4<br>fig3b | Each case, Histogram, gaussian fit | Meth ods para 38  | p=0.0405                             | Results para 4                  | t(16)=1.86                         | Results para 4<br>fig 3f legend  |
| +<br>- | fig 3f<br>deep / superficial<br>gaussian fit | normality shapiro wilk test | Fig3 legend       | 11,7 | cells from 17 rats                       | fig 3f legend           | histogram, gaussian fitted line    | fig 3f legend     | deep: p=0.9859<br>super: p=0.9378    | fig 3f legend                   | deep: W=0.99<br>super: W=0.97      | Fig 3f legend                    |
| +<br>- | fig 3f<br>Cb+ / Cb-                          | unpaired t-test             | fig 3f legend     | 11,7 | cells from 17 rats                       | fig 3f legend           | histogram, gaussian fitted line    | fig 3f legend     | p=0.0923                             | fig 3f legend                   | t(16)=1.38                         | Fig 3f legend                    |
| +<br>- | fig 3f<br>Cb+ / Cb-<br>gaussian fit          | normality shapiro wilk test | Fig3f legend      | 11,7 | cells from 17 rats                       | fig 3f legend           | histogram, gaussian fitted line    | fig 3f legend     | Cb+: p=0.1394<br>Cb-=0.8568          | fig 3f legend                   | Cb+: W=0.88<br>Cb-: W=0.96         | Fig 3f legend                    |
| +<br>- | fig 3g<br>deep / superficial                 | Mann-Whitney test           | Results para 4    | 11,7 | cells from 17 rats                       | Results para 4<br>fig3b | Each case, Histogram, gaussian fit | Meth ods para 38  | p=0.0135                             | fig 3f legend<br>Results para 4 | ranksum=140                        | Results para 4,<br>fig 3g legend |
| +<br>- | fig 3g<br>Cb+ / Cb-                          | Mann-Whitney test           | -                 | 11,7 | cells from 17 rats                       | -                       | Each case, Histogram, gaussian fit | Meth ods para 38  | p=0.1011                             | -                               | ranksum=114                        | -                                |
| +<br>- | fig 3g<br>deep / superficial<br>gaussian fit | normality shapiro wilk test | Fig3g legend      | 11,7 | cells from 17 rats                       | Fig3g legend            | histogram, gaussian fitted line    | Fig3g legend      | deep: p=0.6691<br>superficial:0.0675 | Fig3g legend                    | deep: 0.8142<br>superficial 0.9522 | Fig3g legend                     |
| +<br>- | fig 3f<br>Cb+ / Cb-<br>gaussian fit          | normality shapiro wilk test | Fig3g legend      | 11,7 | cells from 17 rats                       | Fig3g legend            | histogram, gaussian fitted line    | Fig3g legend      | Cb+: 0.2403<br>Cb-: 0.0113           | Fig3g legend                    | Cb+: 0.9103<br>Cb-: 0.7457         | Fig3g legend                     |
| +<br>- | fig 4d<br>pv boutons                         | Pearson correlation         | Results para 5    | 34   | cells from 4 confocal stacks from 3 rats | Results para 5          | regression line, each case         | Results para 5    | p = 0.01626                          | Results para 5<br>Fig 4d        | r(32)= 0.3979                      | Results para 5<br>Fig 4d         |
| +<br>- | fig 4e<br>cb1 boutons                        | Pearson correlation         | Results para 5    | 34   | cells from 4 confocal stacks from 3 rats | Results para 5          | regression line, each case         | Results para 5    | p=0.0046                             | Results para 5<br>Fig 4d        | r(32)=-0.46                        | Results para 5<br>Fig 4e         |
| +<br>- | supp fig4C                                   | Pearson correlation         | Supp. Fig4 legend | 129  | cells from 1 confocal stack from 1 rat   | Supp. Fig4 legend       | regression line, each case         | Supp. Fig4 legend | p=2.384e-015                         | Supp. Fig4, legend              | r(127)=-0.6251                     | Supp. Fig4, legend               |

|        |                                                           |                                          |                                         |       |                                         |                        |                                |                                                  |                                                                                                                                           |                           |                                                                                                                                                       |                                           |
|--------|-----------------------------------------------------------|------------------------------------------|-----------------------------------------|-------|-----------------------------------------|------------------------|--------------------------------|--------------------------------------------------|-------------------------------------------------------------------------------------------------------------------------------------------|---------------------------|-------------------------------------------------------------------------------------------------------------------------------------------------------|-------------------------------------------|
| +<br>- | fig5c<br>left                                             | no<br>stadistical<br>analysis            | Fig 5c<br>legend                        | 12    | slices from 5 rats                      | Fig 5c<br>legend       | mean +/- SEM                   | -                                                | -                                                                                                                                         | -                         | -                                                                                                                                                     | -                                         |
| +<br>- | fig5c<br>right                                            | unpaired t-<br>test                      | Results<br>para 6                       | 12,8  | field response for<br>20 slices 15 rats | Results<br>para 6      | error bars are<br>mean +/- SEM | Meth<br>os<br>para<br>38                         | p= 0.6831                                                                                                                                 | Results<br>para 6         | t(18)=0.415                                                                                                                                           | Results<br>para 6                         |
| +<br>- | supp<br>Fig<br>6a                                         | unpaired t-<br>test                      | Fig.<br>legend                          | 21,17 | cells from 35 slices<br>from 25 rats    | supp Fig<br>6a         | mean +/- SD                    | Meth<br>os<br>para<br>38                         | Resting pot.<br>p=0.0135<br>Tau p=0.6943<br>Rm p=0.4489<br>Cm p=0.3983                                                                    | supp Fig<br>6a            | Resting pot.<br>t(36)=2.599<br>Tau t(36)=-0.396<br>Rm t(36)=0.279<br>Cm t(36)=0.084                                                                   | -                                         |
| +<br>- | fig5e<br>left                                             | unpaired t-<br>test                      | Results<br>para 7                       | 12,8  | cells from 20 slices<br>from 15 rats    | Results<br>para 7      | error bars are<br>mean +/- SD  | Meth<br>os<br>para<br>38                         | p=0.0021                                                                                                                                  | Results<br>para 7         | t(18)=-3.395                                                                                                                                          | Results<br>para 7                         |
| +<br>- | fig5f<br>left                                             | Pearson<br>correlation                   | Results<br>para 7                       | 12,8  | cells from 20 slices<br>from 15 rats    | Results<br>para 7      | regression line,<br>each case  | Meth<br>os<br>para<br>38                         | p=8.59e-5                                                                                                                                 | Results<br>para 7         | F(1,18)=25.358<br>r(18)=0.76                                                                                                                          | Results<br>para 7                         |
| +<br>- | fig5e<br>right                                            | unpaired t-<br>test                      | Results<br>para 7                       | 12,8  | cells from 20 slices<br>from 15 rats    | Results<br>para 7      | error bars are<br>mean +/- SD  | Meth<br>os<br>para<br>38                         | p=0.2221                                                                                                                                  | Results<br>para 7         | t(18)=1.266                                                                                                                                           | Results<br>para 7                         |
| +<br>- | fig5f<br>right                                            | Pearson<br>correlation                   | Results<br>para 7                       | 12,8  | cells from 20 slices<br>from 15 rats    | Results<br>para 7      | regression line,<br>each case  | Meth<br>os<br>para<br>38                         | p=0.0358                                                                                                                                  | Results<br>para 7         | F(1,18)=5.147<br>r(18)=0.47                                                                                                                           | Results<br>para 7                         |
| +<br>- | supp<br>fig<br>6B                                         | unpaired t-<br>test                      | Fig.<br>legend                          | 12,8  | cells from 20 slices<br>from 15 rats    | supp. fig<br>6b legend | error bars are<br>mean +/- SD  | Meth<br>os<br>para<br>38                         | EPSC<br>p=0.0671<br>IPSC p=0.0341                                                                                                         | supp. fig<br>6b<br>legend | EPSC<br>t(18)=-1.949<br>IPSC t(18)=-2.293                                                                                                             | supp. fig<br>6b legend                    |
| +<br>- | Resul<br>ts,<br>para<br>7<br>(age<br>corre<br>latio<br>n) | Pearson<br>correlation                   | Results<br>para 7                       | 43    | cells from 40 slices<br>from 30 rats    | -                      | regression<br>coefficient      | Meth<br>os<br>para<br>38                         | EPSC<br>p=0.3191<br>IPSC p=0.5894                                                                                                         | Results<br>para 7         | EPSC F(1,41)=<br>1.019;<br>r(41)=-0.15<br>IPSC<br>F(1,41)=0.290;<br>r(41)=0.08                                                                        | Results<br>para 7                         |
| +<br>- | supp<br>6d<br>right                                       | paired t-test                            | Results<br>para 7                       | 12,8  | cells from 20 slices<br>from 15 rats    | Results<br>para 7      | error bars are<br>mean +/- SD  | Meth<br>os<br>para<br>38                         | sup p=1.8e-5<br>dee p=0.0082                                                                                                              | Results<br>para 7         | sup t(11)=-7.192<br>dee t(7)=-3.647                                                                                                                   | Results<br>para 7                         |
| +<br>- | fig5g                                                     | unpaired t-<br>test                      | Fig. 5g<br>legend                       | 12,8  | cells from 20 slices<br>from 15 rats    | Results<br>para 7      | error bars are<br>mean +/- SD  | Meth<br>os<br>para<br>38                         | p=0.0431                                                                                                                                  | Results<br>para 7         | t(18)=2.179                                                                                                                                           | Results<br>para 7                         |
| +<br>- | fig5i<br>left                                             | unpaired t-<br>test<br><br>paired t-test | Results<br>para 8<br><br>Fig.<br>legend | 5,4   | cells from 9 slices<br>from 5 rats      | Results<br>para 8      | error bars are<br>mean +/- SD  | Meth<br>os<br>para<br>38<br><br>Fig 5i<br>legend | sup vs dee:<br>control<br>p=0.0061<br>damgo<br>p=0.115<br>damgo+win<br>p=0.118<br><br>control vs<br>damgo<br>sup p=0.0284<br>dee p=0.0055 | Results<br>para 8         | sup vs dee:<br>control<br>t(7)=-3.872<br>damgo<br>t(7)=-1.796<br>damgo+win<br>t(7)=-1.780<br><br>control vs damgo<br>sup t(4)=3.981<br>dee t(4)=5.449 | Methos<br>para 38<br><br>Fig 5i<br>legend |
| +<br>- | fig 5i<br>right                                           | Pearson<br>correlation                   | Results<br>para 8                       | 5,4   | cells from 9 slices<br>from 5 rats      | Results<br>para 8      | regression line,<br>each case  | Result<br>s para<br>8                            | control<br>p=7.95e-4<br>damgo<br>p=0.0131<br>damgo+win<br>p=0.0610                                                                        | Results<br>para 8         | control<br>F(1,7)=31.638;<br>r(7)=82<br>damgo<br>F(1,7)=10.944;<br>r(7)=78<br>damgo+win<br>F(1,7)=4.970                                               | Results<br>para 8<br><br>Fig.<br>legend   |

|        |                                                 |                                                             |                           |                         |                                  |                           |                                                       |                                 |                                                                                                                     |                           |                                                                                                         |                           |
|--------|-------------------------------------------------|-------------------------------------------------------------|---------------------------|-------------------------|----------------------------------|---------------------------|-------------------------------------------------------|---------------------------------|---------------------------------------------------------------------------------------------------------------------|---------------------------|---------------------------------------------------------------------------------------------------------|---------------------------|
| +<br>- | fig3l<br>left                                   | unpaired t-test                                             | Results para 9            | 7,5                     | cells from 10 slices from 8 rats | Results para 9            | error bars are mean +/- SD                            | Methos para 38                  | p=0.0474                                                                                                            | Results para 9            | t(10)=-2.259                                                                                            | Results para 9            |
| +<br>- | fig3l<br>right                                  | unpaired t-test                                             | Results para 9            | 7,5                     | cells from 10 slices from 8 rats | Results para 9            | error bars are mean +/- SD                            | Methos para 38                  | p=7.1e-4                                                                                                            | Results para 9            | t(10)=4.813                                                                                             | Results para 9            |
| +<br>- | supp<br>fig6e                                   | unpaired t-test                                             | Supp. Fig 6e legend       | 7 sup, 5 dee            | cells from 10 slices from 8 rats | -                         | error bars are mean +/- SD                            | Methos para 38                  | EPSC p=0.3529<br>IPSC p=0.4540                                                                                      | -                         | EPSC t(10)=-0.974<br>IPSC t(10)=0.779                                                                   | -                         |
| +<br>- | supp<br>fig6f                                   | linear regression                                           | supp fig6f legend         | 7 sup, 5 dee            | cells from 10 slices from 8 rats | -                         | regression line, each case                            | -                               | EPSC p=0.0054<br>IPSC p=0.0184                                                                                      | supp fig6f, legend        | EPSC F(1,10)=10.518<br>IPSC p=7.900                                                                     | -                         |
| +<br>- | Fig6c                                           | paired t-test                                               | Fig4c<br>Results para 11  | 4,3,6,7 (left to right) | cells from 20 rats               | Fig4c<br>Results para 11  | error bars are mean +/- SD from each cell type        | Fig4c<br>Methos para 38         | p=0.0464 CA3<br>p=0.0441 CA2<br>p=0.0173 CA1 sup<br>p=0.0275 CA1 deep                                               | Fig4c<br>Results para 11  | t(3)=-3.27<br>t(2)=3.13<br>t(5)=-3.49<br>t(6)=2.89                                                      | Fig4c legend              |
| +<br>- | SPW part vs df<br>fig 6d<br>Results para 11     | Pearson correlation<br>unpaired t-test                      | fig 4d<br>Results para 11 | 11,7                    | cells from 17 rats               | fig 4d<br>Results para 11 | regression line<br>blox plot                          | fig 4d<br>Results para 11       | p=0.0134<br>p=0.004                                                                                                 | fig 4d<br>Results para 11 | r=0.66<br>t(11)=3.29                                                                                    | fig 6d<br>Results para 11 |
| +<br>- | SPW part vs str rad<br>fig6e<br>Results para 11 | Pearson correlation<br>Shapiro wilk test<br>unpaired t-test | fig 6e<br>Results para 11 | 6,4                     | cells from 10 rats               | fig 6e<br>Results para 11 | regression line<br>all cases, histogram, gaussian fit | fig 6e<br>Results para 11       | p = 0.0492<br>p=0.1612 deep,<br>p=0.1607 sup<br>p(sub vs deep)=0.0431<br>p=0.1749 cb+,<br>p=0.060 cb-<br>p(cb)=0.03 | fig 6e<br>Results para 11 | r=-0.60<br>W=0.82 deep,<br>W=87 sup<br>t(8)=2.35 deep vs sup<br>W=0.87 cb+,<br>W=0.77 cb-<br>t(8)=2.146 | fig 6e<br>Results para 11 |
| +<br>- | SPW fr vs str rad<br>fig6f<br>Results para 11   | Pearson correlation<br>Shapiro wilk test<br>unpaired t-test | fig 6f<br>Results para 11 | 6,4                     | cells from 10 rats               | fig 6f<br>Results para 11 | regression line<br>all cases, histogram, gaussian fit | fig 6f<br>Results para 11       | p=0.0187<br>p=0.7804 sup;<br>p=0.5954 deep<br>p(sup vs deep)=0.043<br>p=0.5954 cb+,<br>p=0.7804 cb-<br>p=0.043      | fig 6f<br>Results para 11 | r=-0.72<br>W= 0.98 sup; W= 93 deep<br>t(8)=1.94 sup vs deep<br>W=0.93 cb+<br>w=0.98 cb-<br>t(8)=1.94    | fig 6f<br>Results para 11 |
| +<br>- | supp table 1<br>Peak amplitude                  | unpaired t-test                                             | supp. table 1             | 12,10                   | cells from 21 rats               | supp. table 1             | mean +/- SD                                           | Methos para 38<br>supp. table 1 | p=0.3135                                                                                                            | supp. table 1             | t(20)=1.0340                                                                                            | -                         |

|        |                                 |                                                                         |                                  |       |                    |                                                  |                                                                                          |                                 |                                                                                                                                          |                                  |                                                                                                    |                                  |
|--------|---------------------------------|-------------------------------------------------------------------------|----------------------------------|-------|--------------------|--------------------------------------------------|------------------------------------------------------------------------------------------|---------------------------------|------------------------------------------------------------------------------------------------------------------------------------------|----------------------------------|----------------------------------------------------------------------------------------------------|----------------------------------|
| +<br>- | supp table 1<br>Rint            | unpaired t-test                                                         | supp. table 1                    | 12,10 | cells from 21 rats | supp. table 1                                    | mean +/- SD                                                                              | Methos para 38<br>supp. table 1 | p=0.6641                                                                                                                                 | supp table 1                     | t(20)=0.4408                                                                                       | -                                |
| +<br>- | table 1<br>Duration             | unpaired t-test                                                         | supp. table 1                    | 12,10 | cells from 21 rats | supp. table 1                                    | mean +/- SD                                                                              | Methos para 38<br>supp. table 1 | p=0.2956                                                                                                                                 | supp table 1                     | t(20)=1.0741                                                                                       | -                                |
| +<br>- | supp table 1<br>SPW resp        | unpaired t-test                                                         | supp. table 1                    | 12,10 | cells from 21 rats | supp. table 1                                    | mean +/- SD                                                                              | Methos para 38<br>supp. table 1 | p=1.3095e-7                                                                                                                              | supp table 1                     | t(20)=7.9399                                                                                       | -                                |
| +<br>- | supp table 1<br>SPW             | unpaired t-test                                                         | supp. table 1                    | 12,10 | cells from 21 rats | supp. table 1                                    | mean +/- SD                                                                              | Methos para 38<br>supp. table 1 | 0.7420                                                                                                                                   | supp table 1                     | t(20)=-0.3338                                                                                      | -                                |
| +<br>- | Fig 7e<br>Results para 13       | paired t-test                                                           | Results para 13<br>Fig 7e legend | 6     | cells from 6 rats  | Results para 13<br>Fig 7e legend                 | error bars are mean +/- SD                                                               | Methos para 38                  | baseline firing rate: p=1.887<br>fr during SPW-r: p=0.8661<br>SPW-r participation: 0.0420                                                | Results para 13<br>Fig 7e legend | baseline firing rate: t(5)=-1.52<br>fr during SPW-r: t(5)=-0.18<br>SPW-r participation: t(5)=-2.71 | Results para 13<br>Fig 7e legend |
| +<br>- | Results para 13<br>supp table 2 | Fisher-Pitman permutation test for each cell and index (100 replicates) | Methos para 33<br>supp table2    | 6     | cells from 6 rats  | Results para 13<br>Methos para 33<br>supp table2 | p-value of significant difference between the observed value and the random distribution | Results para 13<br>supp table2  | Rat147t1h1: p<0.001<br>Rat38t2h2: p=0.2574<br>Rat75t1h1: p=0.8119<br>Rat23t1h1: p=0.0494<br>Rat16t1h3: p=0.8119<br>Rat83d1t1h3: p=0.3665 | supp table2                      | -                                                                                                  | supp table2                      |

|        |                                 |                                                                         |                 |         |                         |                                    |                                                                                          |                 |                                                                                                                                           |                           |                                 |                           |
|--------|---------------------------------|-------------------------------------------------------------------------|-----------------|---------|-------------------------|------------------------------------|------------------------------------------------------------------------------------------|-----------------|-------------------------------------------------------------------------------------------------------------------------------------------|---------------------------|---------------------------------|---------------------------|
| +<br>- | Results para 13<br>SPW-ripples  | Fisher-Pitman permutation test for each cell and index (100 replicates) | Methods para 33 | 6       | cells from 6 rats       | Results para 13<br>Methods para 33 | p-value of significant difference between the observed value and the random distribution | Results para 13 | Rat147t1h1: p=0.4158<br>Rat38t2h2: p=0.7822<br>Rat75t1h1: p=0.0198<br>Rat23t1h1: p=0.4851<br>Rat16t1h3: p=0.6438<br>Rat83d1t1h3: p=0.0792 | -                         | -                               | -                         |
| +<br>- | Fig7j<br>Results para 13        | Pearson correlation                                                     | Results para 13 | 6       | cells from 6 rats       | Results para 14<br>Fig 7j          | regression line                                                                          | Methods para 38 | p=0.0134                                                                                                                                  | Results para 13<br>Fig7j  | r=0.71                          | Results para 13<br>fig 7j |
| +<br>- | Fig 7k left<br>Results para 14  | Pearson correlation                                                     | Results para 14 | 6       | cells from 6 rats       | Results para 14<br>Fig 7k          | regression line                                                                          | Methods para 38 | gray: p=0.312<br>black=0.0423                                                                                                             | Results para 14<br>Fig 7k | gray: r=-0.68<br>black: r=-0.82 | Results para 14<br>Fig 7k |
| +<br>- | Fig 7k right<br>Results para 14 | Pearson correlation                                                     | Results para 14 | 6       | cells from 6 rats       | Results para 14<br>Fig 7k          | regression line                                                                          | Methods para 38 | gray: p=0.3<br>black=0.0309                                                                                                               | Results para 14<br>Fig 7k | gray: r=-0.69<br>black: r=-0.85 | Results para 14<br>Fig 7k |
| +<br>- | supp table 2                    | no statistical analysis                                                 | supp table 2    | 11, etc | cells from 11, etc rats | supp table 2                       | Mean +/- sd                                                                              | Methods para 38 | -                                                                                                                                         | -                         | -                               | -                         |

## ► Representative figures

1. Are any representative images shown (including Western blots and immunohistochemistry/staining) in the paper?

If so, what figure(s)?

Yes

Figure 1B,C,D,E  
Figure 2A,B,C,D  
Figure 3A,C,D,E  
Figure 4 A,B,C  
Figure 5A,B,C,D,H,J,K,M;  
Figure 6A,B,B;  
Figure 7A,B,C,D,F,G,H,I,L,M;  
Supp Figure 1A,A,B,C,D,E;  
Supp Figure 2A;  
Supp Figure 3A,B,C;  
Supp Figure 4A,C,C';  
Supp Figure 5A,A',B,C;  
Supp Figure 6C,C',D.  
Supp Figure 7A,B,C,D,E,F,G



2. For each representative image, is there a clear statement of how many times this experiment was successfully repeated and a discussion of any limitations in repeatability?

If so, where is this reported (section, paragraph #)?

Repeatability not discussed. "n" reported for each.

Figure 1 and 2- Results, section 1, parag 1 (Fig1B,C,D); parag 3 (Fig2A,B,C); Fig Legend (Fig2D).

Figure 3 and 4.- Results, section 2, parag 1 (Fig3A,C,D,E); parag 2 (Fig4A,B,C).

Figure 5.- Results, section 3, parag 1 (Fig5A,B); parag 2 (Fig5D); parag 3 (Fig5H); parag 4 (Fig5J,,K,M); Fig Legend (Fig5C).

Figure 6.- Results, section 4, parag 1 (Fig6A,B).

Figure 7- Results, section 5, para 1 and 2 (Fig7A,B,C,D,E,F,G)

Supp Fig 1.- Results, section 1, parag 1 (SuppFig1A); Fig Legend (SuppFig1B); Methods, section 2, parag 1 (SuppFig1C,D,E)

Supp Fig 2.- Results, section 1, parag 2 (SuppFig2A).

Supp Fig 3.- Results, section 1, parag 3 (SuppFig3A,B,C).

Supp Fig 4.- Results, section 2, parag 1 (SuppFig4A); Fig Legend (SuppFig4C).

Supp Fig 5.- Methods, section 4, parag 1 (SuppFig5A,B,C).

Supp Fig 6.- Results, section 3, parag 2 (SuppFig6C,D).

Supp Fig 7. - Results, section5, para 2 (SuppFig7 A,B,C,D,E,F,G)

## ► Statistics and general methods

1. Is there a justification of the sample size?

If so, how was it justified?

Where (section, paragraph #)?

Even if no sample size calculation was performed, authors should report why the sample size is adequate to measure their effect size.

no sample size calculation was performed

2. Are statistical tests justified as appropriate for every figure?

Where (section, paragraph #)?

Standard statistical test are used. See Material and methods, last section

- a. If there is a section summarizing the statistical methods in the methods, is the statistical test for each experiment clearly defined?

Yes.  
Material and methods, last section

- b. Do the data meet the assumptions of the specific statistical test you chose (e.g. normality for a parametric test)?

Where is this described (section, paragraph #)?

Normality and homocedasticity was not statistically tested due to the small sample sizes (except where it is indicated, with Shapiro-Wilk test for normality and Barlett test for homogeneity of variances), but we checked the distribution and the dispersion of all parameters before statistical analysis. We have plotted all individual values in our figures to show data variability

- c. Is there any estimate of variance within each group of data?

Is the variance similar between groups that are being statistically compared?

Where is this described (section, paragraph #)?

No (except where Shapiro-Wilk test for normality was made), but we report the standard deviation and dispersion for all data points.

- d. Are tests specified as one- or two-sided?

all tests were two-tailed, unless otherwise indicated

|                                                                                                                                                                                                                                     |                                                                                                                                                                                                                                                                |
|-------------------------------------------------------------------------------------------------------------------------------------------------------------------------------------------------------------------------------------|----------------------------------------------------------------------------------------------------------------------------------------------------------------------------------------------------------------------------------------------------------------|
| e. Are there adjustments for multiple comparisons?                                                                                                                                                                                  | yes                                                                                                                                                                                                                                                            |
| 3. Are criteria for excluding data points reported?<br>Was this criterion established prior to data collection?<br>Where is this described (section, paragraph #)?                                                                  | We have no excluded data points in any figure.                                                                                                                                                                                                                 |
| 4. Define the method of randomization used to assign subjects (or samples) to the experimental groups and to collect and process data.<br>If no randomization was used, state so.<br>Where does this appear (section, paragraph #)? | Electrophysiological analyses were performed with the whole database at once. Groups (depolarized/hyperpolarized, deep/superficial, CB+/CB-) were identified using criteria that are specified in Material and Methods (Statistical analysis and comparisons). |
| 5. Is a statement of the extent to which investigator knew the group allocation during the experiment and in assessing outcome included?<br>If no blinding was done, state so.<br>Where (section, paragraph #)?                     | n/a-                                                                                                                                                                                                                                                           |
| 6. For experiments in live vertebrates, is a statement of compliance with ethical guidelines/regulations included?<br>Where (section, paragraph #)?                                                                                 | Yes,<br>Methods para 1                                                                                                                                                                                                                                         |
| 7. Is the species of the animals used reported?<br>Where (section, paragraph #)?                                                                                                                                                    | Yes. All animals were rats.<br>Methods para 2 and 7                                                                                                                                                                                                            |
| 8. Is the strain of the animals (including background strains of KO/transgenic animals used) reported?<br>Where (section, paragraph #)?                                                                                             | Yes, Wistar rats were used for all experiments. Methods, sections 2,4 and 5 first paragraph                                                                                                                                                                    |
| 9. Is the sex of the animals/subjects used reported?<br>Where (section, paragraph #)?                                                                                                                                               | Both male and female rats were used. Methods, sections 2,4 and 5 first paragraph                                                                                                                                                                               |
| 10. Is the age of the animals/subjects reported?<br>Where (section, paragraph #)?                                                                                                                                                   | The age is reported for juvenile and young adults of in vitro experiments (Methods, section 4, first paragraph)<br>The weight is reported for adults used for in vivo experiments (Methods, sections 2 and 5, first paragraph)                                 |
| 11. For animals housed in a vivarium, is the light/dark cycle reported?<br>Where (section, paragraph #)?                                                                                                                            | Yes, 12 h light/dark cycle. Methods, section 5, second para                                                                                                                                                                                                    |
| 12. For animals housed in a vivarium, is the housing group (i.e. number of animals per cage) reported?<br>Where (section, paragraph #)?                                                                                             | n/a                                                                                                                                                                                                                                                            |

13. For behavioral experiments, is the time of day reported (e.g. light or dark cycle)?

Where (section, paragraph #)?

Yes, freely moving recordings were obtained on the light cycle

14. Is the previous history of the animals/subjects (e.g. prior drug administration, surgery, behavioral testing) reported?

Where (section, paragraph #)?

n/a

a. If multiple behavioral tests were conducted in the same group of animals, is this reported?

Where (section, paragraph #)?

n/a

15. If any animals/subjects were excluded from analysis, is this reported?

Where (section, paragraph #)?

Yes, the different subsets of cells used for each analysis is reported all along the ms. In particular, see Results para 2, para 3, para 4, para 11. See also methods, statistical section for group criteria.

a. How were the criteria for exclusion defined?

Where is this described (section, paragraph #)?

Exclusion criteria were intrinsic to this type of analysis:

i) Intracellular correlation with the CSD SPW and ripple component, with good LFP hippocampal profile and sufficient (>10) number of events at resting potential without spikes. Results para 2.

ii) For reversal and driving force analyses sufficient number of events at different holding potentials under stable recording conditions (i.e reversal correlation would be statistically significant) are required. Results para 2

iii) For intracellular subthreshold oscillations associated to ripples, sufficient number of events without spikes are required. Results para 3.

iv) For histological comparison only successfully recovered cells are included. Results para 4.

v) For PSTH only cells recorded at the resting membrane potential with spikes for a sufficient number of events were considered. Results para 11

vi) For in vitro, only slices with clear calbindin expression, which depend on age and coordinates, were included (Methods, section 7 para 3).

vii) For evaluation of behavioral effects on single-cell recordings in freely moving conditions only animals exhibiting sufficient number of events in sleep and awake conditions were considered (Methods, section 11)

viii) For evaluation of spatial effects on single-cell recordings in freely moving conditions only animals exhibiting sufficient number of events along more than 2 locations in awake conditions were considered (Methods, section 11)

b. Specify reasons for any discrepancy between the number of animals at the beginning and end of the study.

Where is this described (section, paragraph #)?

n/a

## ► Reagents

1. Have antibodies been validated for use in the system under study (assay and species)?
 

yes

  - a. Is antibody catalog number given?
 

yes. Methods, para 10 and 11

 Where does this appear (section, paragraph #)?
  - b. Where were the validation data reported (citation, supplementary information, Antibodypedia)?
 

Methods, para 12

 Where does this appear (section, paragraph #)?
2. Cell line identity
  - a. Are any cell lines used in this paper listed in the database of commonly misidentified cell lines maintained by [ICLAC](#) and [NCBI Biosample](#)?
 

n/a

 Where (section, paragraph #)?
  - b. If yes, include in the Methods section a scientific justification of their use--indicate here in which section and paragraph the justification can be found.
 

n/a
  - c. For each cell line, include in the Methods section a statement that specifies:
 

n/a

    - the source of the cell lines
    - have the cell lines been authenticated? If so, by which method?
    - have the cell lines been tested for mycoplasma contamination?
 Where (section, paragraph #)?

## ► Data deposition

Data deposition in a public repository is mandatory for:

- a. Protein, DNA and RNA sequences
- b. Macromolecular structures
- c. Crystallographic data for small molecules
- d. Microarray data

Deposition is strongly recommended for many other datasets for which structured public repositories exist; more details on our data policy are available [here](#). We encourage the provision of other source data in supplementary information or in unstructured repositories such as [Figshare](#) and [Dryad](#).

We encourage publication of Data Descriptors (see [Scientific Data](#)) to maximize data reuse.

1. Are accession codes for deposit dates provided?
 

n/a

 Where (section, paragraph #)?

## ▶ Computer code/software

Any custom algorithm/software that is central to the methods must be supplied by the authors in a usable and readable form for readers at the time of publication. However, referees may ask for this information at any time during the review process.

1. Identify all custom software or scripts that were required to conduct the study and where in the procedures each was used.

Scripts were written in Matlab

2. If computer code was used to generate results that are central to the paper's conclusions, include a statement in the Methods section under "**Code availability**" to indicate whether and how the code can be accessed. Include version information as necessary and any restrictions on availability.

A section is included in Material and Methods. Routines are available upon request

## ▶ Human subjects

1. Which IRB approved the protocol?

Where is this stated (section, paragraph #)?

n/a

2. Is demographic information on all subjects provided?

Where (section, paragraph #)?

n/a

3. Is the number of human subjects, their age and sex clearly defined?

Where (section, paragraph #)?

n/a

4. Are the inclusion and exclusion criteria (if any) clearly specified?

Where (section, paragraph #)?

n/a

5. How well were the groups matched?

Where is this information described (section, paragraph #)?

n/a

6. Is a statement included confirming that informed consent was obtained from all subjects?

Where (section, paragraph #)?

n/a

7. For publication of patient photos, is a statement included confirming that consent to publish was obtained?

Where (section, paragraph #)?

n/a

## ► fMRI studies

For papers reporting functional imaging (fMRI) results please ensure that these minimal reporting guidelines are met and that all this information is clearly provided in the methods:

1. Were any subjects scanned but then rejected for the analysis after the data was collected? 
  - a. If yes, is the number rejected and reasons for rejection described? 

Where (section, paragraph #)?
2. Is the number of blocks, trials or experimental units per session and/or subjects specified? 

Where (section, paragraph #)?
3. Is the length of each trial and interval between trials specified?
4. Is a blocked, event-related, or mixed design being used? If applicable, please specify the block length or how the event-related or mixed design was optimized.
5. Is the task design clearly described? 

Where (section, paragraph #)?
6. How was behavioral performance measured?
7. Is an ANOVA or factorial design being used?
8. For data acquisition, is a whole brain scan used? 

If not, state area of acquisition.

  - a. How was this region determined?
9. Is the field strength (in Tesla) of the MRI system stated? 
  - a. Is the pulse sequence type (gradient/spin echo, EPI/spiral) stated?
  - b. Are the field-of-view, matrix size, slice thickness, and TE/TR/flip angle clearly stated?
10. Are the software and specific parameters (model/functions, smoothing kernel size if applicable, etc.) used for data processing and pre-processing clearly stated?

11. Is the coordinate space for the anatomical/functional imaging data clearly defined as subject/native space or standardized stereotaxic space, e.g., original Talairach, MNI305, ICBM152, etc? Where (section, paragraph #)? n/a
12. If there was data normalization/standardization to a specific space template, are the type of transformation (linear vs. nonlinear) used and image types being transformed clearly described? Where (section, paragraph #)? n/a
13. How were anatomical locations determined, e.g., via an automated labeling algorithm (AAL), standardized coordinate database (Talairach daemon), probabilistic atlases, etc.? n/a
14. Were any additional regressors (behavioral covariates, motion etc) used? n/a
15. Is the contrast construction clearly defined? n/a
16. Is a mixed/random effects or fixed inference used? n/a
- a. If fixed effects inference used, is this justified? n/a
17. Were repeated measures used (multiple measurements per subject)? n/a
- a. If so, are the method to account for within subject correlation and the assumptions made about variance clearly stated? n/a
18. If the threshold used for inference and visualization in figures varies, is this clearly stated? n/a
19. Are statistical inferences corrected for multiple comparisons? n/a
- a. If not, is this labeled as uncorrected? n/a
20. Are the results based on an ROI (region of interest) analysis? n/a
- a. If so, is the rationale clearly described? n/a
- b. How were the ROI's defined (functional vs anatomical localization)? n/a
21. Is there correction for multiple comparisons within each voxel? n/a
22. For cluster-wise significance, is the cluster-defining threshold and the corrected significance level defined? n/a

## ▶ Additional comments

---

Additional Comments



Supplement: NIHMS67469-supplement-Checklist.pdf [file NIHMS67469-supplement-Checklist.pdf]
